# Supplementary material for: Social connections and participation among people with mild cognitive impairment: barriers and recommendations
Source: Front Psychiatry. 2023 Jul 5;14:1188887. doi: 10.3389/fpsyt.2023.1188887 (PMC10356108; doi:10.3389/fpsyt.2023.1188887)
Supplement: Supplementary file 1 [file Table_1.docx]

# Appendix

### Appendix 1 Focus groups guidelines (people with MCI and caregivers).

| Topic | Number | Question for people with MCI | Question for caregiver |
| --- | --- | --- | --- |
| Basic Information | 1 | How long your diagnosis with MCI? | What is the relationship of you and the patient? |
| 2 | / | How long are you being a formal/informal caregiver? |
| Daily routine | 3 | Could you please tell me about your typical day? What do you usually do? (The daily routine exercises) | / |
| 4 | What kind of things do you tend to do around your home (e.g., go to food market, pick up grandchild, cleaning, cooking, walking, square dancing, managing finances)? | What kind of things do older adults tend to do around their home (e.g., go to food market, pick up grandchild, cleaning, cooking, walking, square dancing, managing finances)? |
| Social Connection | 5 | Could you please tell me your social connection circle? | Which level of social connection circle you suggest them to expand? |
| 6 | How do you usually connect with your family, friends? | If you want to enhance the social connection of people with MCI, what would you suggest them to do? |
| 7 | What kind of technology support you to manage your social connection? | What kind of technology support older adults to manage social connection? |
| 8 | How much effort do you put on? | How much effort do them put on? |
| 9 | What may stop you to build social connection? | In your opinion, what may stop them to build social connection |
| 10 | What may motivate you to build social connection? | In your opinion, what may motivate them to build social connection |
| Social Participation | 11 | What social activity do you usually do? | Which social activities are most popular? |
| Are you satisfied with the things you do? Why? | What attributes of social activities will attract them? |
| 12 | Is there some social activities you would like to start doing, resume doing, or do more of? | What kind of social activities you suggest them to do more of? |
| 13 | What difficulties do you have in doing these activities? (e.g., memory, language, attention. Visuospatial, executive/planning) | What difficulties do they have in doing these activities? (e.g., memory, language, attention. Visuospatial, executive/planning) |
| 14 | How will you cope with your difficulty? | What will you suggest them to cope with these difficulties? |
| 15 | What kind of technology support you to manage your social participation? | What kind of technology support older adults to manage your social participation? |
| How it helps？ | How it helps？ |
| 16 | If you woke up tomorrow and did not have any difficulties, what would be different? | / |
| 17 | As you mentioned, what you want change most? | What will you suggest them to change first? |
| Community-based activities | 18 | Do you join social groups, clubs? | Which social groups are most popular? |
| 19 | Where are the social groups happening? | Where are the social groups happening? |
| 20 | How do you evaluate the social group that is suitable for you? | Which kind of social group you suggest them to join? |
| 21 | How do you feel when you are in these social groups? Could you describe it? | How the participation generates the sense of belonging? |
| Closing question | 22 | Do you have anything to further explain? | Do you have anything to further explain? |
